# Supplementary material for: Muscle-specific deletion of SOCS3 increases the early inflammatory response but does not affect regeneration after myotoxic injury
Source: PubMed Central journal article supplement (PMC5078888; doi:10.1186/s13395-016-0108-4), 2016-10-24
Supplement: 13395_2016_108_MOESM3_ESM.pdf [file 13395_2016_108_MOESM3_ESM.pdf]

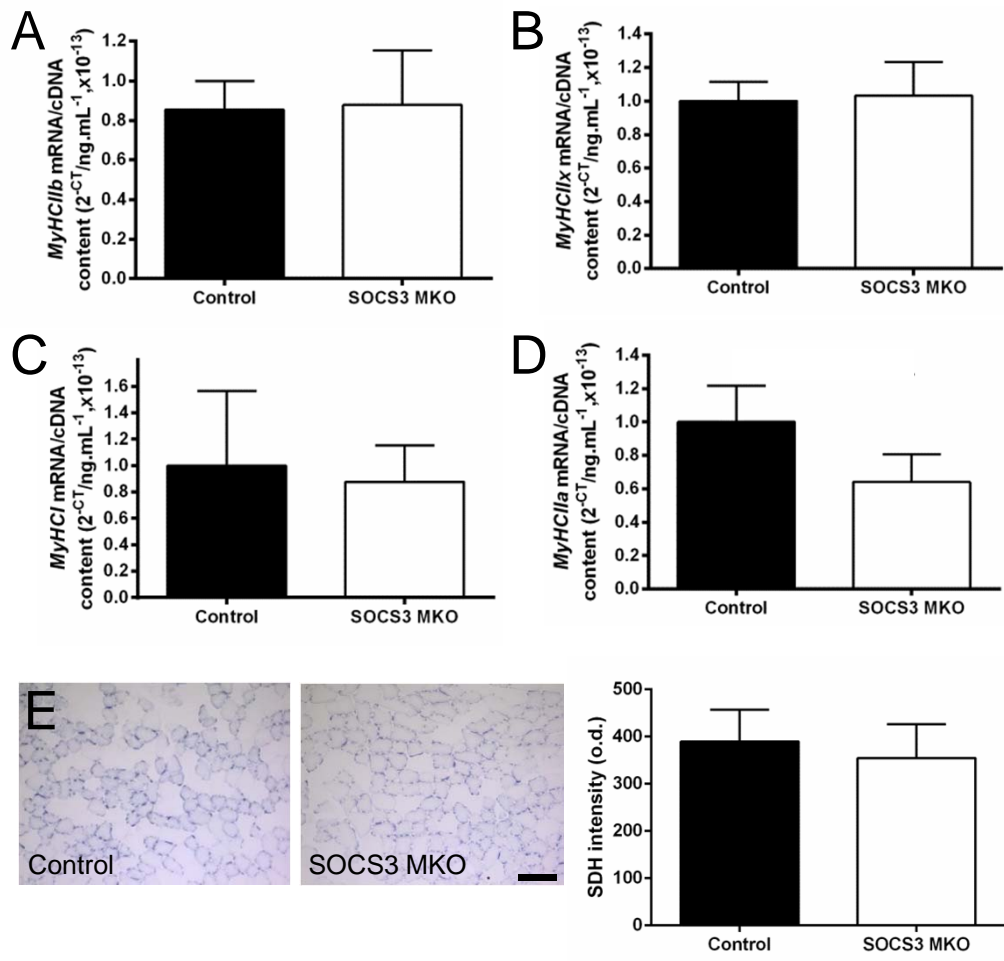

Figure S3
